# Supplementary material
Source: PubMed Central journal article supplement (PMC7718389)
Supplement: NIHMS1641445-supplement-Supplementary_Info_-_1.pdf [file NIHMS1641445-supplement-Supplementary_Info_-_1.pdf]

# Supporting Information

## **Bead-based extracellular vesicle analysis using flow cytometry**

Katherine S. Yang<sup>1,2\*</sup>, Hsing-Ying Lin<sup>1\*</sup>, Caleigh Curley<sup>1</sup>, Marisa W. Welch<sup>3</sup>, Brian Wolpin<sup>3</sup>, Hakho Lee<sup>1,2</sup>, Ralph Weissleder<sup>1,2,4</sup>, Hyungsoon Im<sup>1,2†</sup>, Cesar M. Castro<sup>1,5†</sup>

<sup>1</sup> Center for Systems Biology, Massachusetts General Hospital, Boston, MA 02114, USA

<sup>2</sup> Department of Radiology, Massachusetts General Hospital, Boston, MA, 02114, USA

<sup>3</sup> Dana-Farber Cancer Institute, Boston, MA 02115

<sup>4</sup> Department of Systems Biology, Harvard Medical School, Boston, MA 02115, USA

<sup>5</sup> Massachusetts General Hospital Cancer Center, Boston, MA 02114, USA.

\* These authors contributed equally to this work.

†Corresponding authors.

E-mail: [im.hyungsoon@mgh.harvard.edu](mailto:im.hyungsoon@mgh.harvard.edu)

E-mail: [castro.cesar@mgh.harvard.edu](mailto:castro.cesar@mgh.harvard.edu)

## Supporting experimental section

**Cell Culture:** AsPC-1, BxPC-3, Capan-2, and MIA PaCa-2 cells were obtained from the American Type Culture Collection (ATCC) and used without any modification. AsPC-1 and BxPC-3 cells were cultured in RPMI 1640 media (Thermo Scientific, 11875119), Capan-2 cells in McCoy's 5a media (Thermo Scientific, 16600108), and MIA PaCa-2 cells in Dulbecco's Modified Eagle's medium (Mediatech, 10-013-CV). All media were supplemented with penicillin (10,000 IU)/streptomycin (10,000 µg/ml, Mediatech 30-002-CI) and 10% fetal bovine serum (Atlanta Biologics, S12450). 1617 cells are a patient-derived xenograft cell line (kind gift from Drs. Carlos Fernandez del Castillo and Andrew Liss, Massachusetts General Hospital) and were cultured in a 50:50 mix of DMEM/F-12 media (Thermo Scientific, 10565042), supplemented as above.

**EV Isolation:** We isolated EVs using size-exclusion columns for human plasma samples as described by Lobb et al. [Lobb et al., 2015, J Extracell Vesicles, 4, 27031] and ultracentrifugation for in vitro cell culture [Théry et al., 2006, Curr Protoc Cell Biol, Chapter 3, Unit 3.22]. EVs from human plasma. Plasma samples were collected from patients who provided informed written consent under a sample collection protocol approved by the Dana-Farber/Harvard Cancer Center IRB. PDAC patients had locally advanced disease, with samples collected at baseline prior to initiation of systemic treatment. All experiments were performed in accordance with relevant guidelines and regulations. Whole blood was collected in one 10 mL purple-top EDTA tube, mixed by inverting 10 times, and then centrifuged for 10 min at 400 × g (4°C). The plasma layer was collected in a 15 mL conical tube without disturbing the buffy coat and was then centrifuged for 10 min at 1100 × g (4°C). The plasma layer was pipetted into a 15 mL tube and stored at -80°C until processing for EVs. qEV size-exclusion columns (qEVoriginal/70nm, iZON Science, SP1) were used for EV isolation and were first washed with 10 mL PBS (0.22µm-filtered). During column washing, 500 µl plasma was cleared by centrifugation at 1500 × g for 10 min (4°C). The supernatant was then spun again at 10,000 × g for 20 min (4°C). 500 µl cleared supernatant was loaded onto the qEV column and 0.5 mL fractions were immediately collected. As soon as the sample completely entered the resin, PBS was added. The first six fractions were discarded (3 mL, column void volume). Fractions 7-9 (1.5 mL total) were pooled and filtered through an Ultrafree 0.22 µm centrifugal filter at 12,000 × g for 1 min (Millipore, UFC40GV0S). The pooled fractions were then concentrated using an Amicon Ultra-4 10kDa filter by centrifugation at 3200 × g for 15 min (Millipore, UFC801024). Concentrated EVs were stored at -80°C. EVs from cell culture. Cells were trypsinized and split into 8 x 15-cm dishes in 20 mL appropriate media containing 5% exosome-depleted FBS (Thermo Scientific, A272801) and grown for 48-72 hours. Media containing released EVs (160 mL total) was collected and centrifuged at 300 × g for 10 min, followed by filtration through a 0.22 µm cellulose-acetate vacuum filter (Fisher Scientific, 09-761-1). Conditioned media was aliquoted to ultracentrifuge tubes (Beckman Coulter, 344058) and then underwent ultracentrifugation at 100,000 × g for 70 min (4°C). Supernatant was removed, EV pellets resuspended in a single tube in PBS and centrifuged a second time at 100,000 × g for 70 min. Supernatant was again removed and the EV pellet resuspended in ~100 µl PBS. EVs were stored at -80°C until use. The size of EVs were measured by dynamic light scattering (DLS) using a Malvern Zetasizer APS (**Figure S10**). EV solutions were diluted by 10-100 fold (depending on the sample) in 100µl total volume of

PBS. Measurement settings were as follows: material refractive index: 0.01, dispersant name: water, dispersant refractive index: 1.33, viscosity (cP): 0.8872, temperature: 25°C, duration used (s): 60. A total of 3 measurements per sample was recorded.

**Single EV Flow Cytometry Staining and Analysis:** 2 µg 1617 EVs were incubated with isotype control-AF488 or EGFR-FITC antibodies (1 µl, 1:50 dilution in a total volume of 50µl PBS/0.5% BSA) overnight with rotation/mixing at 4°C. Excess antibody was removed by diluting samples to 500µl volume with PBS/0.5% BSA and purifying EVs using the qEV size exclusion columns, as described above for EV purification from patient plasma. Fractions 7-9 from iZON columns were concentrated using Amicon Ultra-4 10kDa centrifugal filter units. Samples were diluted to 200 µl final volume in PBS/0.5% BSA and run on the CytoFlex flow cytometer (Beckman Coulter, C09752, B2-R0-V2 configuration) using Violet SSC to resolve smaller particles and the following settings: FSC 201V, SSC 30V, violet SSC (VSSC) 22V (threshold using VSSC, 2000 on area), FITC 20V, and width set on FSC. The 525/40 nm bandpass filter (Beckman, A01-1-0051) was used for FITC measurement. Mix and backflush options were not used and samples were run at a 10µl/min flow rate. 100nm dragon green fluorescent microspheres were used to identify smaller particles on the flow cytometer (Bangs Labs, FC02F). Controls used in the flow cytometer measurements include: PBS/0.5% BSA buffer only (no EVs) and rat IgG2ak-AF488 isotype control antibody. Given the sample loss during processing and technical nature of single EV flow cytometry, as many events as possible were collected (typically between 1000 to 5000 events). Post-measurement analysis was done using FlowJo (v10), with gating first done using the 100 nm dragon green beads to identify small particles. Subsequent gating on FITC negative vs positive signal was done using the isotype control treated sample and the percentage of EGFR-positive EV was identified.

**Scanning electron microscopy:** After dehydration in a series of increasing ethanol concentrations, samples were transferred for critical drying and subsequently coated with 2 nm platinum/palladium using a sputter coater (EMS 150T S Metal Sputter Coater), before imaging with a field-emission scanning electron microscope (Ultra Plus, Zeiss).

**EV adsorption onto latex beads and flow cytometry:** EV adsorption onto latex beads for flow cytometry followed the protocol of Théry et al.[Théry et al., 2006, Curr Protoc Cell Biol, Chapter 3, Unit 3.22]. Briefly, 0.5 µg 1617 EV per 10 µl 3.9µm (Thermo Scientific, A37304, 4% w/v,  $1.3 \times 10^9$  particles/mL,  $1.3 \times 10^7$  particles in 10 µl) or 5µm (Thermo Scientific, A37306, 4% w/v,  $4.9 \times 10^8$  particles/mL,  $4.9 \times 10^6$  particles in 10 µl) aldehyde/sulfate latex beads were mixed. This step was done in bulk, with 6µg 1617 EV diluted in 120µl latex beads. Samples were diluted to a final volume of 1mL in PBS and adsorption proceeded overnight at 4°C on a rotator wheel. To stop the reaction, 110µl of 1M glycine (in PBS) was added and incubated for 30 min at room temperature on a nutating mixer. Samples were centrifuged at 4000 rpm for 3 min and supernatant was removed/discarded. Latex beads were then washed twice with 1mL PBS/1% BSA. After the final wash, samples were resuspended in 1.2 mL PBS/1% BSA and 100µl per well were aliquoted to a u-bottom 96-well plate. Staining for flow cytometry was done using identical conditions and flow cytometer setting as described above for streptavidin-polystyrene beads.

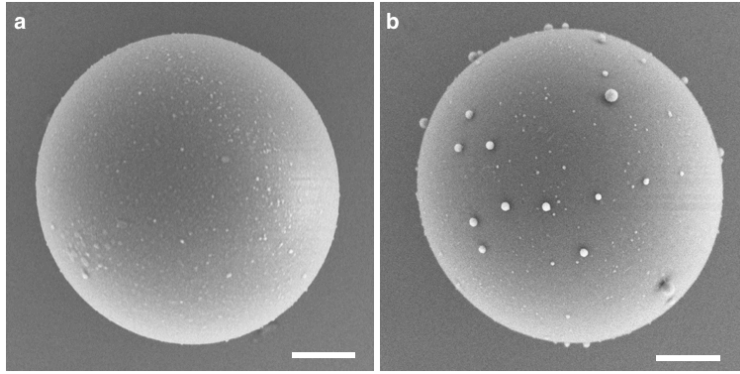

**Figure S1.** Scanning electron micrographs (SEMs) showing (a) PS bead used for EV capture and (b) EVs captured on the PS beads.

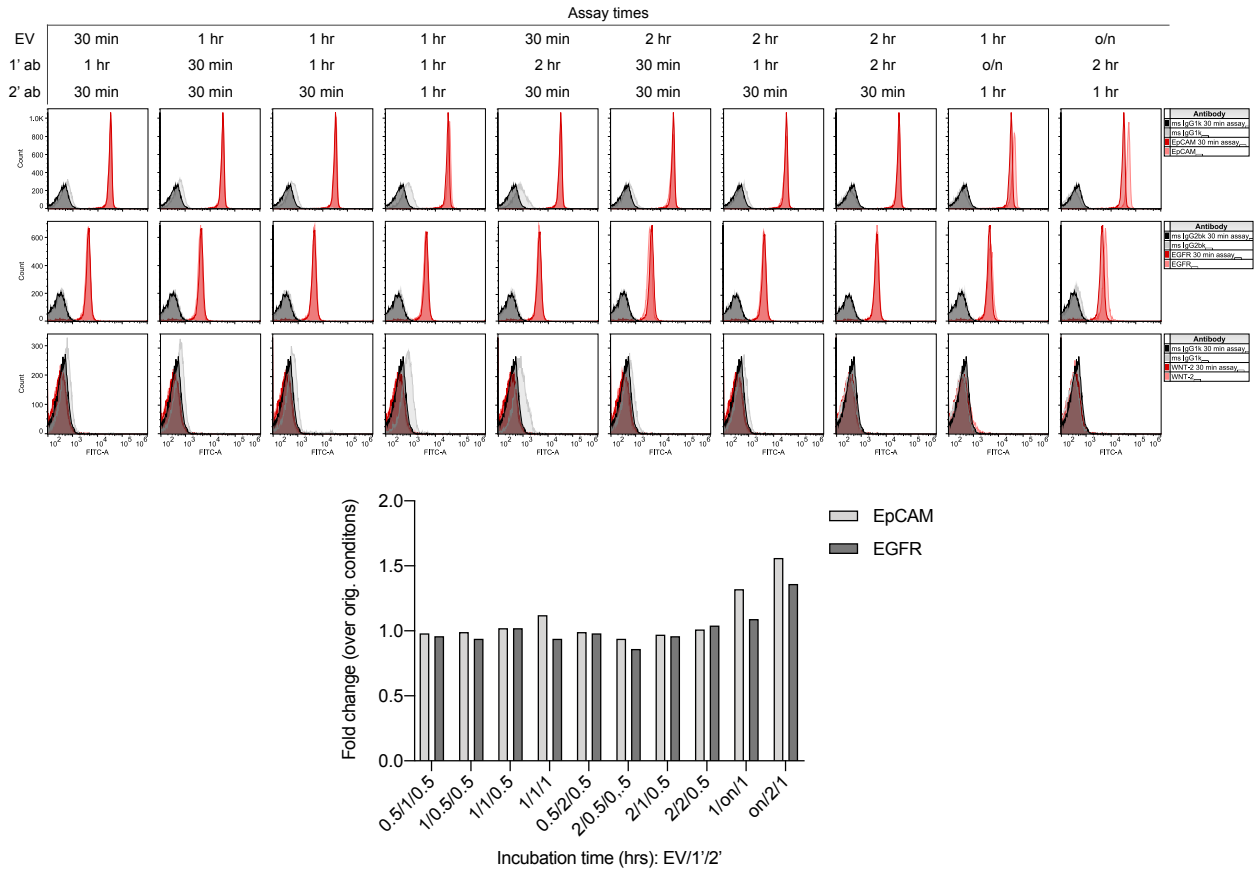

**Figure S2. Effect of varying assay time on BEAD-flow signal.** Biotinylated 1617 EV were incubated with streptavidin polystyrene beads for 30 min to overnight (o/n). Primary antibody incubation time was also varied from 30 min to o/n and secondary antibody staining varied from 30 min to 1 hr. 1617 EV were evaluated for EpCAM (high expression), EGFR (med expression), or WNT-2 (no expression) median fluorescent intensity signal (pink histograms) over isotype control background (gray histograms). The bar graph shows the fold change in median fluorescent intensity of new assay times over the median fluorescent intensity of the original assay conditions (30 min EV incubation with beads, 30 min primary antibody, 30 min secondary antibody). Note that longer incubation times do not lead to a significant increase in signal.

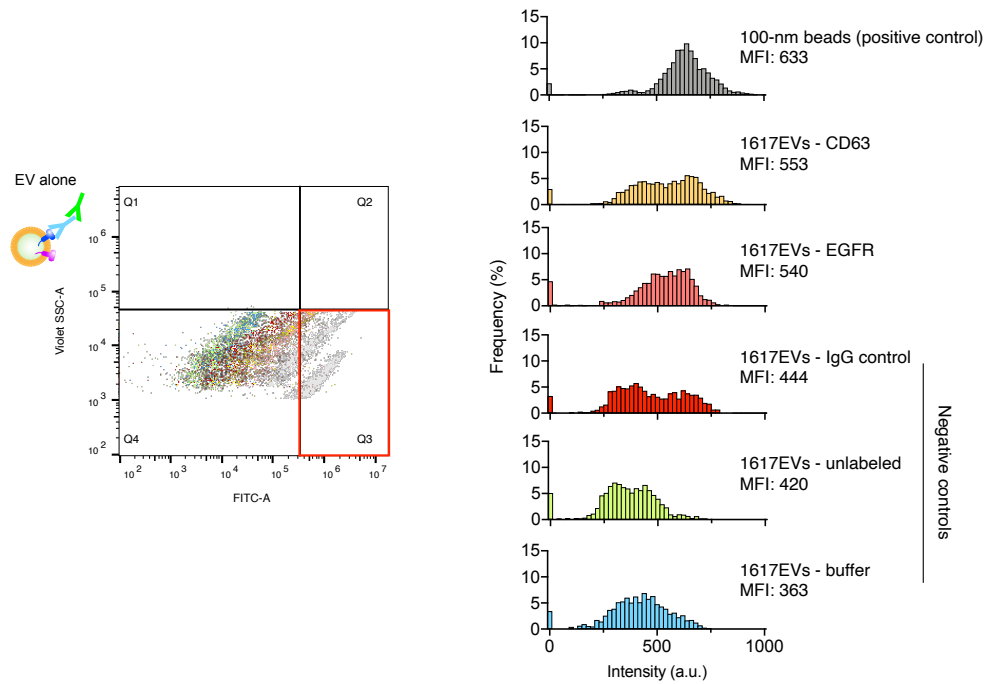

**Figure S3. Single EV flow cytometry.** Dot plot of EVs from a patient-derived xenograft cell line (1617 PDAC) stained with a FITC-EGFR antibody and measured using violet SSC on a CytoFlex flow cytometer. Q3 represents EVs positive for EGFR staining (gated on isotype stained EVs). Dot plot color coding matches the histograms shown on the right. EGFR positive EVs were identified using a combination of buffer only (blue), unlabeled EVs (green), isotype control antibody staining (red), and 100nm beads (gray). EVs were also positive for CD63, indicating the presence of CD63+ particles in our sample. MFI: Median fluorescence intensity.

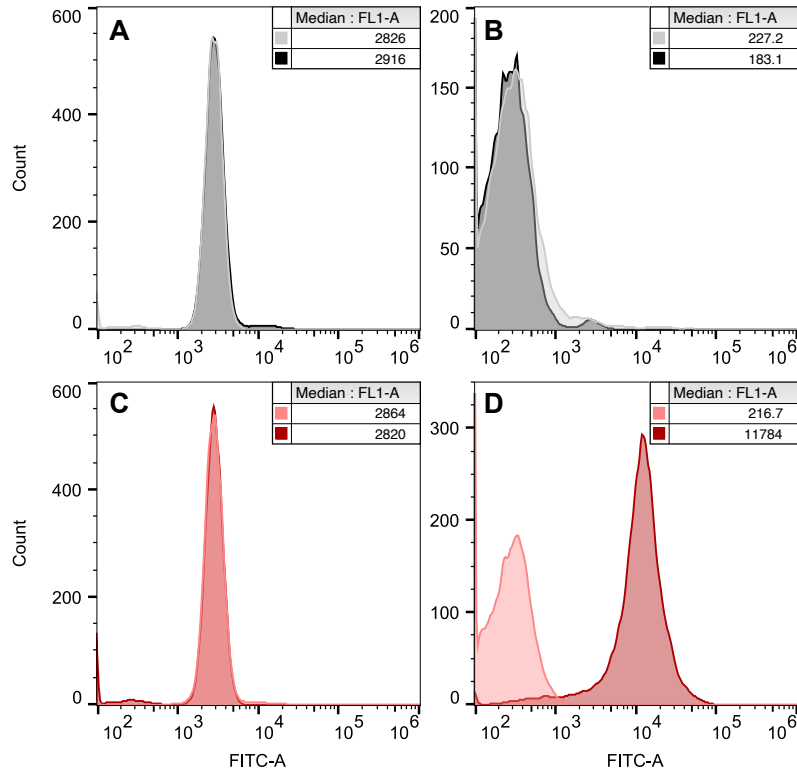

**Figure S4. Effect of bead type and EV biotinylation on assay.** Unmodified polystyrene (A, C) or streptavidin-labeled polystyrene beads (B, D) were incubated with unlabeled 1617 EV (A, B) or biotinylated 1617 EV (C, D). Beads were stained with mouse IgG1k isotype control (light gray or light pink) or EpCAM antibody (black or red). Note only the combination of biotinylated EV and streptavidin polystyrene beads results in an increase in fluorescent signal over background. Median fluorescence intensity is shown in the legend of each histogram.

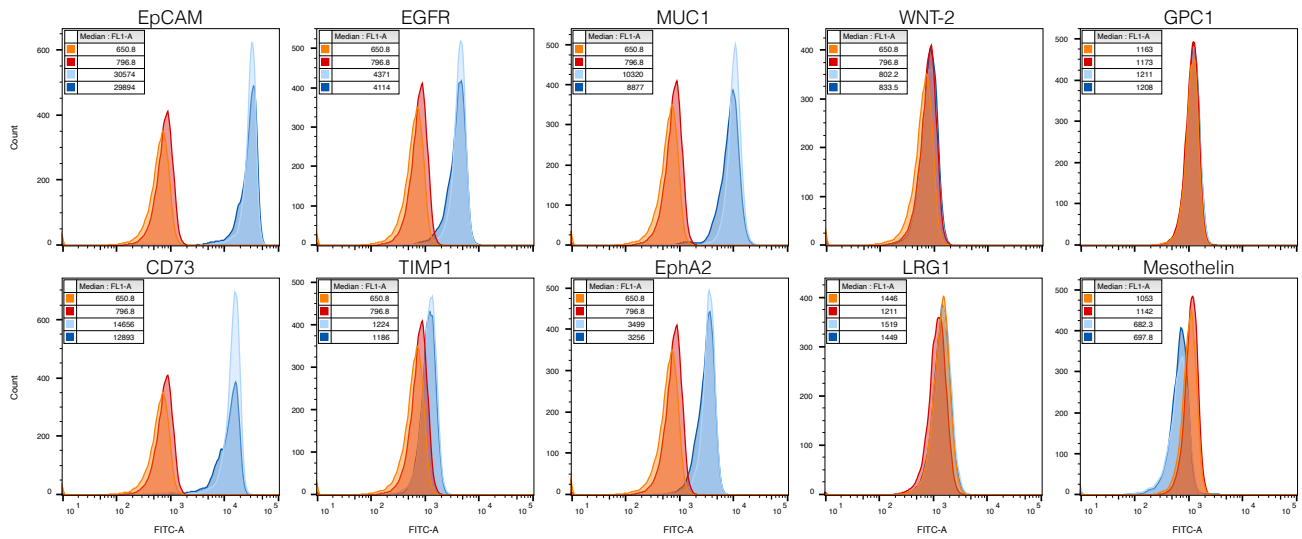

**Figure S5. Bead-based flow reproducibility.** 1617 PDAC EVs were isolated and biotinylated on different days. EVs were captured on streptavidin polystyrene beads and were stained with an isotype control (orange) or primary (blue) antibody for bead-based flow analysis on different days to assess assay reproducibility. Median fluorescence intensity is shown in the legend of each histogram.



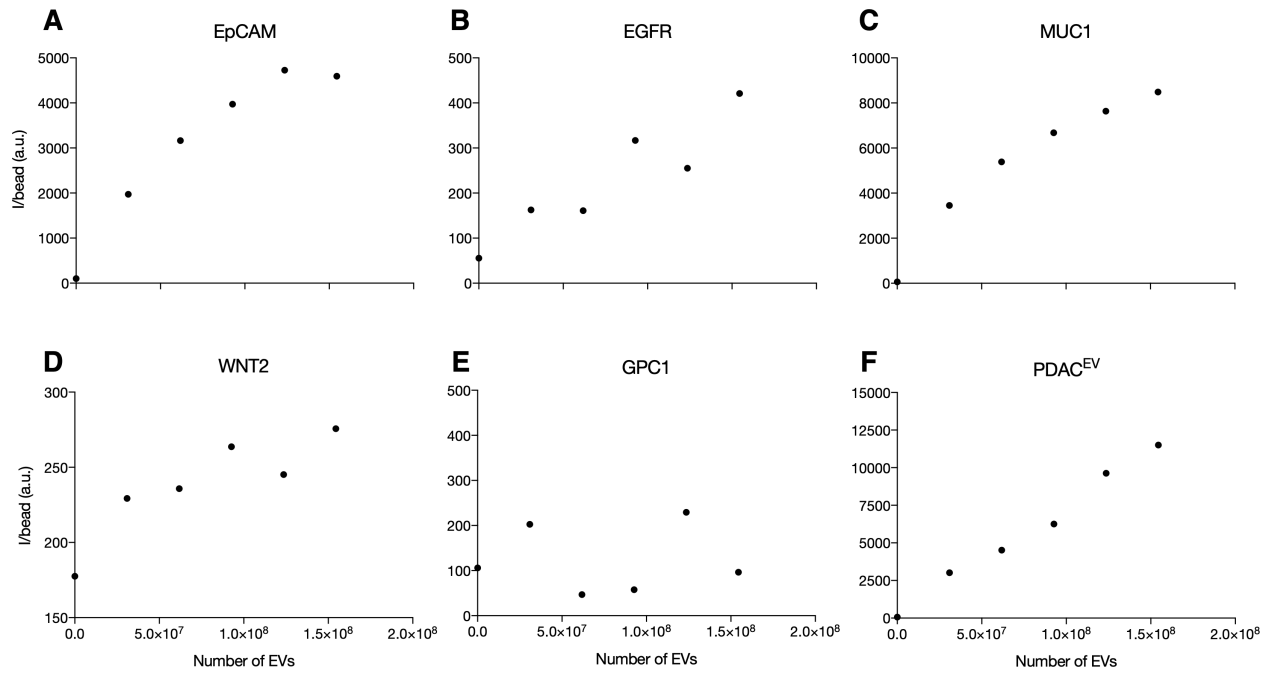

**Figure S6. EV titration curves for limit of detection analysis of each antibody used in bead-based flow.** Increasing numbers of biotinylated 1617 EVs were captured on streptavidin polystyrene beads and stained with antibodies against (A) EpCAM, (B) EGFR, (C) MUC1, (D) WNT2, (E) GPC1, and (F) PDAC<sup>EV</sup> cocktail (mixture of all 5 antibodies). Signal intensity per bead was calculated, with isotype control signal subtracted, and plotted versus the number of EVs.

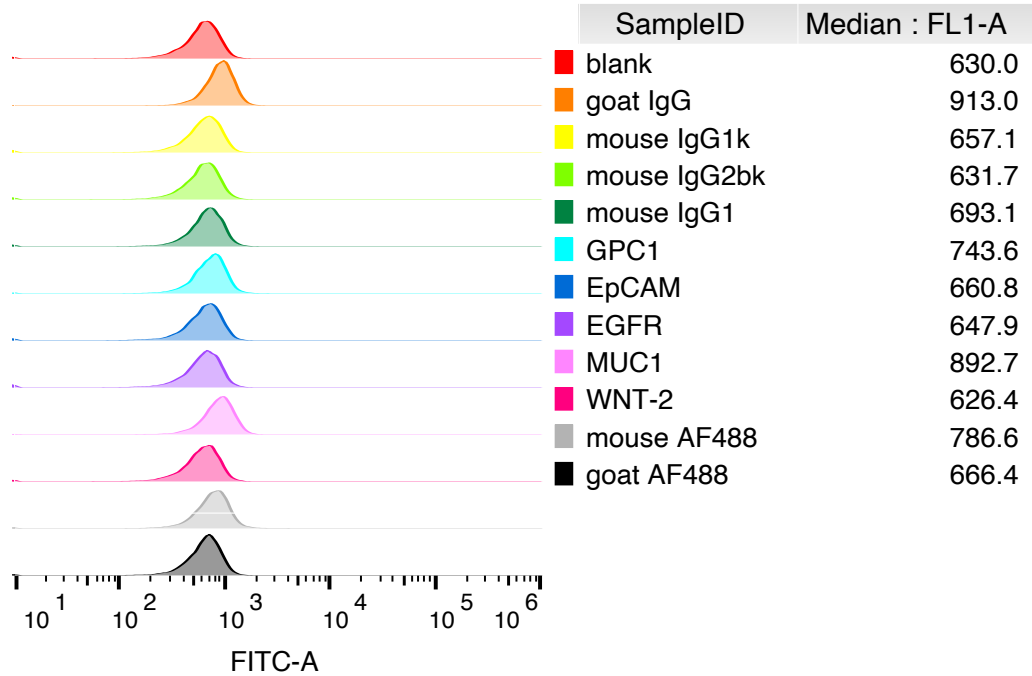

**Figure S7. Background antibody binding to streptavidin-coated polystyrene (PS) beads in bead-based flow.** 5  $\mu\text{m}$  streptavidin-coated PS beads were stained with the indicated primary antibodies, followed by the indicated secondary antibodies to confirm that the antibodies used in this study do not bind to beads in the absence of EVs. Median fluorescence is shown in the legend for each antibody.

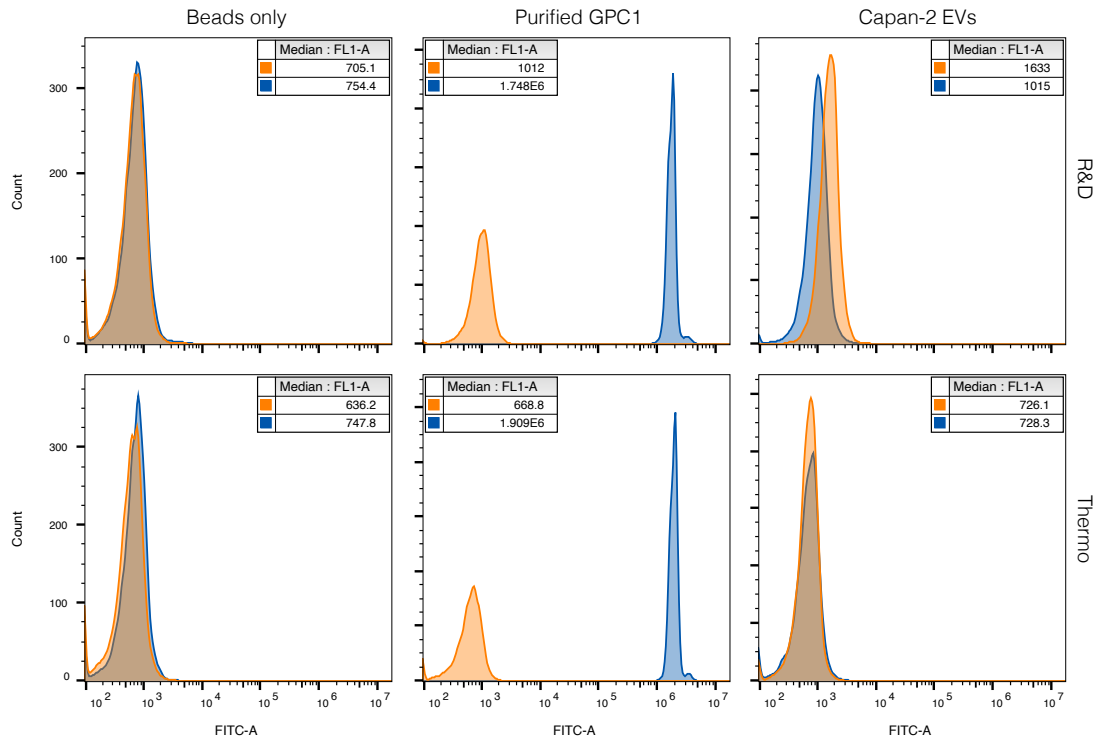

**Figure S8. GPC1 antibody testing in bead-based flow.** Streptavidin polystyrene beads alone (left), with biotinylated purified GPC1 protein (middle), or with biotinylated Capan-2 EVs (right) captured were stained with two commercially available GPC1 antibodies (blue) and compared to matching isotype control antibodies (orange). Median fluorescence intensity is shown in the legend for each histogram.

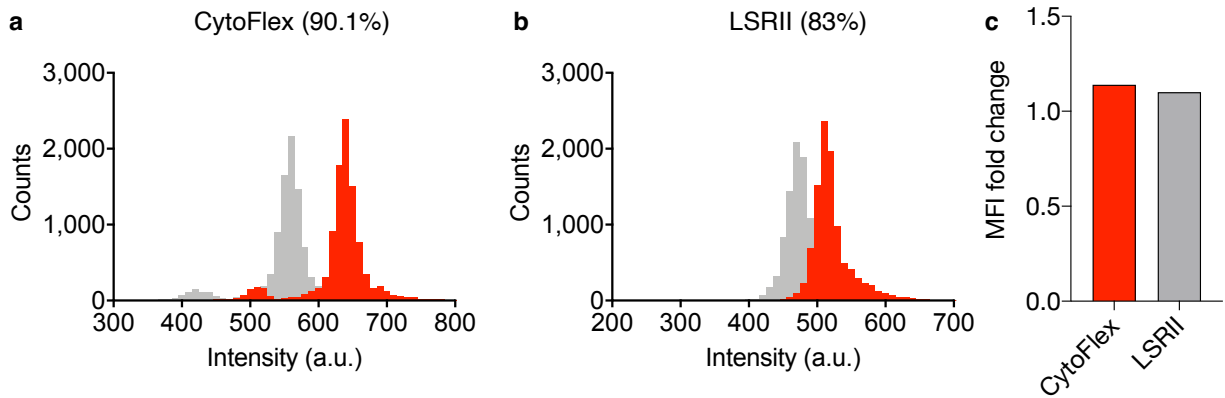

**Figure S9. Variability tests of the assay using two flow cytometers in different laboratories.** Aliquoted EV samples from patient 2 (P2) were processed and stained for MUC1 in two different laboratories and measured by two different flow cytometers **(a)** CytoFlex and **(b)** LSR II. **(c)** Both measurements show comparable median fluorescence intensity (MFI) fold change over isotype control. The variation could be further reduced by adjusting and optimizing gain settings in a new instrument (LSR II).

|                | AsPC-1 | BxPC-3 | Capan-2 | Mia<br>PaCa-2 | 1617 | C1   | C2   | C3   | P1   | P2   | P3   | P4   | P5   | P6   | P7   | P8   | P9   | P10  |
|----------------|--------|--------|---------|---------------|------|------|------|------|------|------|------|------|------|------|------|------|------|------|
| Size<br>(d.nm) | 40.5   | 90.6   | 94.7    | 97.7          | 93.6 | 93.6 | 99.1 | 150  | 155  | 117  | 88.2 | 112  | 88.9 | 63.0 | 139  | 81.9 | 84.5 | 95.8 |
| SD<br>(d.nm)   | 14.7   | 31.3   | 31.8    | 28.3          | 32.1 | 35.7 | 33.2 | 51.1 | 56.0 | 46.6 | 27.5 | 37.5 | 30.5 | 21.9 | 46.3 | 29.3 | 40.7 | 17.6 |

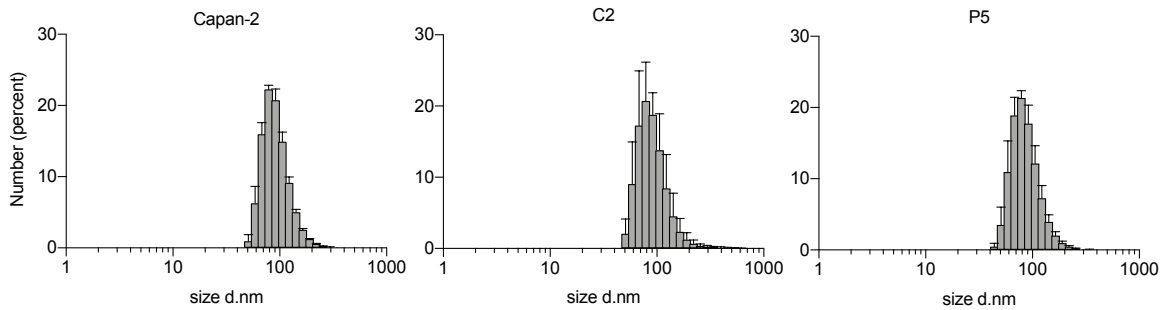

**Figure S10.** EV size measurements of cell line EVs and patient sample EVs by dynamic light scattering using a Malvern Zetasizer APS. Each sample represents the mean and standard deviation of at least two measurements.

**Table S1. Minimum EV amounts needed in bead-based flow for antibody detection.** EVs from 1617 PDAC cells were biotinylated and captured on streptavidin polystyrene beads, followed by staining with the indicated antibodies, or isotype control antibodies, for bead-based flow analysis. \*ng: the total protein amount of biotinylated EVs required as measured using the Qubit protein assay.

| <b>PDAC<sup>EV</sup> Antibody</b> | <b>Limit of detection (ng)*</b> | <b>Limit of detection (# EVs)</b> |
|-----------------------------------|---------------------------------|-----------------------------------|
| <b>Cocktail</b>                   | 41.34                           | 1.28E+07                          |
| <b>EGFR</b>                       | 48.02                           | 1.48E+07                          |
| <b>EpCAM</b>                      | 49.62                           | 1.53E+07                          |
| <b>MUC1</b>                       | 60.77                           | 1.88E+07                          |
| <b>WNT2</b>                       | 127.45                          | 3.94E+07                          |

**Table S2. Antibodies used in this study.**

|                          | <b>Antibody</b>   | <b>Company</b> | <b>Catalog Number</b> | <b>Species</b>          | <b>Clonality</b> | <b>Use</b>               |
|--------------------------|-------------------|----------------|-----------------------|-------------------------|------------------|--------------------------|
| Isotype                  | Goat IgG          | Invitrogen     | 02-6202               | Goat                    |                  |                          |
|                          | Mouse IgG1k       | BioLegend      | 400102                | Mouse                   |                  | FC, WB, IP, ICC, IF, IHC |
|                          | Mouse IgG2bk      | Abcam          | ab18469               | Mouse                   | Monoclonal       | IHC, WB, FC, IP          |
|                          | Mouse IgG1        | R&D            | MAB002                | Mouse                   | Monoclonal       | FC                       |
|                          | Rabbit IgG        | Abcam          | ab172730              | Rabbit                  | Monoclonal       | IF, IHC, FC, CHIPseq, IP |
|                          | Rat IgG2Ak        | BioLegend      | 400502                | Rat                     |                  | FC, IF, IHC, WB, IP      |
|                          | Rat IgG2ak-AF488  | BioLegend      | 400525                | Rat                     |                  | FC                       |
| Primary                  | Glypican 1 (GPC1) | R&D            | AF4519                | Goat IgG                | Polyclonal       | WB, FC, IF               |
|                          | EpCAM             | Abcam          | ab20160               | Mouse IgG1k             | Monoclonal       | IF, FC, ELISA, IHC       |
|                          | EGFR              | Abcam          | ab30                  | Mouse IgG2bk            | Monoclonal       | IHC, IP, IF, FC          |
|                          | MUC1              | Fitzgerald     | 10-M93A               | Mouse IgG1              | Monoclonal       | ELISA, IHC, WB           |
|                          | WNT-2             | Santa Cruz     | sc-514382             | Mouse IgG1k             | Monoclonal       | WB, IP, IF, ELISA        |
|                          | CD73              | BD Pharmingen  | 550256                | Mouse IgG1k             | Monoclonal       | FC                       |
|                          | EphA2             | R&D            | MAB3035               | Mouse IgG <sub>2A</sub> | Monoclonal       | WB, FC, IF               |
|                          | Mesothelin        | R&D            | MAB32652              | Rat IgG <sub>2A</sub>   | Monoclonal       | FC                       |
|                          | LRG1              | Invitrogen     | PA5-25904             | Rabbit IgG              | Polyclonal       | WB, IHC, FC              |
|                          | TIMP1             | Invitrogen     | MS608PABX             | Mouse IgG1              | Monoclonal       | FC, IF, IHC, WB          |
|                          | EGFR-FITC         | Abcam          | ab11400               | Rat IgG <sub>2a</sub>   | Monoclonal       | FC                       |
| Secondary AlexaFluor 488 | Mouse IgG (H&L)   | Abcam          | ab150117              | Mouse IgG               | Polyclonal       | IHC, IF, FC, ELISA       |
|                          | Goat IgG (H&L)    | Abcam          | ab150133              | Goat IgG                | Polyclonal       | IHC, IF, FC, ELISA       |
|                          | Rabbit IgG (H&L)  | Abcam          | ab150073              | Rabbit IgG              | Polyclonal       | IF, IC, IHC, ELISA       |
|                          | Rat IgG (H&L)     | Abcam          | ab150153              | Rat IgG                 | Polyclonal       | IF, ELISA, FC, IHC       |
